# Supplementary material for: Multiparticulate Systems of Ezetimibe Micellar System and Atorvastatin Solid Dispersion Efficacy of Low-Dose Ezetimibe/Atorvastatin on High-Fat Diet-Induced Hyperlipidemia and Hepatic Steatosis in Diabetic Rats
Source: PubMed Central journal article supplement (PMC8004026; doi:10.3390/pharmaceutics13030421), 2021-03-20
Supplement: pharmaceutics-13-00421-s001.pdf [file pharmaceutics-13-00421-s001.pdf]

# Supplementary Materials: Multiparticulate Systems of Ezetimibe Micellar System and Atorvastatin Solid Dispersion Efficacy of Low-Dose Ezetimibe/Atorvastatin on High-Fat Diet-Induced Hyperlipidemia and Hepatic Steatosis in Diabetic Rats

Carlos Torrado-Salmerón <sup>1</sup>, Víctor Guarnizo-Herrero <sup>1</sup>, Joana Henriques <sup>2</sup>, Raquel Seiça <sup>2</sup>, Cristina M. Sena <sup>2</sup> and Santiago Torrado-Santiago <sup>1,3,\*</sup>

Photomicrography and visual appearance of the liver samples.

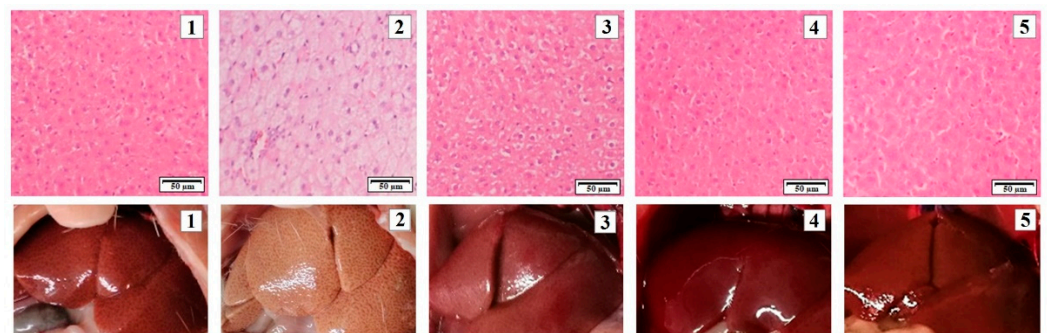

**Figure S1.** Photomicrography (hematoxylin-eosin, 20X) and visual appearance of the liver tissues in GK (diabetic) rats after 8 weeks of treatment. (1) Control group (Control), (2) HFD group, (3) ezetimibe/atorvastatin raw material (EZ/ATV-RM), (4) multiparticulate system MPS-I and (5) multiparticulate system MPS-II.
